# Supplementary material
Source: PubMed Central journal article supplement (PMC4687796)
Supplement: BPH-172-5068-s001.pdf [file BPH-172-5068-s001.pdf]

---

# 1 Propranolol decreases fear memory retention via modulating the stability of 2 surface **GluA1** in the lateral amygdala

## 3 Supplementary Material

### 4 Supplementary Methods

#### 5 Surgical procedure and microinjection

6 Stereotaxic surgery was operated according to our previous studies (Jiang et al.,  
7 2013; Luo et al., 2014; Wu et al., 2013) with necessary modification. Briefly, rats  
8 were anesthetized with pentobarbital sodium (60 mg/kg) by i.p. injection and placed  
9 in a stereotaxic apparatus (Stoelting, USA) with the bregma and posterior in the same  
10 level. The body temperature was maintained at  $37.0\pm 0.2^{\circ}\text{C}$  by an electric  
11 incandescent lamp. Two stainless-steel guide cannulas (23 gauge, 12 mm long) were  
12 bilaterally implanted into the LA region (2.8 mm posterior to the bregma, 5.0 mm  
13 lateral to the midline, 5.4 mm below the cranial theca). The cannulas were fixed to the  
14 skull with the aid of jeweler screws and dental acrylic resin and dental cement. Rats  
15 were allowed to recover from the anesthesia before being returned to their home cages.  
16 Rats were given 7 days for recovery before further experiments. The drugs were  
17 administrated via intra-LA infusion with a microsyringe (5  $\mu\text{L}$ ) connected by a PE-10  
18 polyethylene tubing to a needle (outside diameter = 0.3 mm, 2.0 mm longer than  
19 guide cannula). The injection rate was set to 1  $\mu\text{L}$  in 2 min and the volume injected  
20 was 1  $\mu\text{L}$  per site. After behavioral experiments, the rats were anaesthetized and  
21 sacrificed by decapitation, and brains were removed and cut in 40- $\mu\text{m}$  coronal slices  
22 and the placements of the cannula were verified. All animals with an erroneous  
23 cannula placement were discarded from statistical analysis.

#### 24 25 Adenoviral infection and overexpression

26  
27 The **GluA1** carboxyl terminus (**GluA1**-C-tail) gene fragment sequence  
28 (CGAGTTCTGCTACAAATCCCGTAGCGAGTCGAAGCGGATGAAGGGTTTCT  
29 GTTTGATCCCACAGCAATCCATCAATGAAGCCATACGGACATCGACCCTCC  
30 CCCGGAACAGTGGGGCAGGAGCCAGCGGAGGAGGCGGCAGTGGAGAGAA  
31 TGGCCGGGTGGTCAGCCAGGACTTCCCAAGTCCATGCAATCCATTCCTG  
32 CATGAGTCACAGTTCAGGGATGCCCTTGGGAGCCACAGGATTGTAA) was  
33 obtained as previously described (Shi et al., 2001). The adenovirus was purchased  
34 from Shanghai Genechem Co., Ltd. (Shanghai, China). **GluA1**-C-tail adenovirus  
35 (CV049) which contains Ubi-driven enhanced green fluorescent protein (EGFP)  
36 reporter and cloning restriction sites (NheI/EcoRI) to allow the introduction of **GluA1**  
37 carboxyl terminus, and control vector adenovirus (GV137) were constructed,  
38 amplified and purified to be  $10^{11}$  PFU/mL. 2.0  $\mu\text{L}$  of adenovirus suspension was  
39 injected in each side LA at a rate of 0.2  $\mu\text{L}/\text{min}$ . Rats were subjected to experiments  
40 36 h after adenovirus injection. The effectiveness of adenoviral transfection was  
41 verified by expression of EGFP under fluorescent microscope (IX51WI; Olympus,  
42 Tokyo, Japan) and principal LA neurons transfected with adenovirus were visualized  
43 under epifluorescent illumination with GFP filter (Olympus) in patch-clamp

1 experiments.

### 3 **Pain threshold measurement**

5 Pain threshold was measured according to our previous studies (Li et al., 2012;  
6 Wang et al., 2011; Yang et al., 2013). Briefly, rats were placed individually into the  
7 conditioning chamber with electric grid. After 3 min of habituation, electric foot  
8 shocks (1 s) were applied starting with an intensity of 0.1 mA. The intensity was  
9 increased gradually by 0.1 mA (with pauses of 30 s between successive stimuli) until  
10 the animal showed the first signs of pain (flinching or jumping), and the  
11 corresponding intensity was taken as the pain threshold.

### 13 **Open-field test**

15 The procedure of open-field test was based on our previous study with minor  
16 modifications (Li et al., 2012). Rats were placed individually into the activity  
17 chamber (40×40×40 cm<sup>3</sup>) monitored by a video motility system. The 20×20 cm<sup>2</sup>  
18 middle part of the activity chamber was defined as central part. The spontaneous  
19 motor activity including the total distance travelled, and the anxiety-like behavior  
20 activity including the total time spent in the central part during 30 min intervals were  
21 monitored and assessed.

### 23 **Electrophysiological recording**

25 Preparation of brain slices and protocol for fEPSP recordings were based on our  
26 previous studies (Li et al., 2012; Luo et al., 2014). The stimulation intensities were  
27 adjusted to produce a fEPSP with 2/3 of the maximal amplitude. After 30 min of  
28 baseline recording, LTD was induced by low-frequency stimulation (LFS; 1 Hz for 15  
29 min) at test intensity. Responses were recorded for 60 min following LFS.

30 Patch-clamp recording was performed according to our previous study with slight  
31 modifications (Li et al., 2012). The rats (4- to 5-week-old) were decapitated and the  
32 brains quickly moved to ice-cold oxygenated cutting solution containing (in mM):  
33 210 sucrose, 5 MgSO<sub>4</sub>, 1 NaH<sub>2</sub>PO<sub>4</sub>, 26 NaHCO<sub>3</sub>, 20 glucose, 11.6 C<sub>6</sub>H<sub>7</sub>NaO<sub>6</sub>, 3.1  
34 C<sub>3</sub>H<sub>3</sub>NaO<sub>3</sub> and aerated with 95% O<sub>2</sub>-5% CO<sub>2</sub>. Coronal brain slices (300 μm)  
35 containing LA were cut by a vibratome (VT 1000S, Leica, Wetzlar, Germany) in  
36 cutting solution and then transferred to a holding chamber with artificial cerebrospinal  
37 fluid (ACSF) containing (in mM): 119 NaCl, 4 KCl, 1.2 MgSO<sub>4</sub>, 2 CaCl<sub>2</sub>, 1 NaH<sub>2</sub>PO<sub>4</sub>,  
38 26 NaHCO<sub>3</sub>, 10 glucose and aerated with 95% O<sub>2</sub>-5% CO<sub>2</sub>. Brain slices were then  
39 maintained at 26 °C for at least 1 h before recording. The brain slice was transferred to  
40 the recording chamber, held submerged and superfused continuously with ACSF at a  
41 flow rate of 1-2 ml/min for recording at 26 °C. Excitatory postsynaptic currents  
42 (EPSCs) of principal neurons in LA were recorded by whole-cell patch recording.  
43 EPSCs were evoked in the presence of  $\gamma$ -aminobutyric acid (GABA)<sub>A</sub> receptor  
44 antagonist bicuculine (20 μM). The pipette (input resistance: 3-6 M $\Omega$ ) solution

1 contains (in mM) 105 K-gluconate, 30 KCl, 10 HEPES, 10 phosphocreatine, 4  
2 ATP-Mg, 0.3 GTP-Na, 0.3 EGTA and 5 QX314 (pH 7.35, 285 mOsm). For  
3 pharmacologically isolated AMPAR or N-methyl-D-aspartate receptor  
4 (NMDAR)-mediated EPSCs, we blocked NMDAR and AMPAR with 100  $\mu$ M AP5  
5 and 20  $\mu$ M CNQX, respectively. The cell membrane potential was held at -70 mV.  
6 NMDAR-mediated EPSCs were recorded in 0 mM  $Mg^{2+}$  ACSF. The cell membrane  
7 potential was held at -70 mV and +40 mV for the rectification of AMPAR-mediated  
8 EPSCs. Data were collected when series resistance fluctuated within 20% of initial  
9 values (10-30 M $\Omega$ ), filtered at 3 kHz and sampled at 10 kHz.

### 11 **Surface protein cross-linking with BS<sup>3</sup>**

13 The surface protein cross-linking was performed according to our previous study  
14 with slight modification (Jiang et al., 2013). The coronal slices of amygdala were  
15 made as for the electrophysiological recordings. After treatments, the amygdala was  
16 dissected and immersed in ice-cold ACSF which was spiked with 1 mM BS<sup>3</sup>  
17 immediately after addition of the tissue. Then the tissue was crosslinked for 30 min at  
18 4  $^{\circ}$ C with gentle agitation and this reaction was terminated by quenching with 100 mM  
19 glycine (15 min at 4  $^{\circ}$ C). The tissue was pelleted by brief centrifugation, resuspended  
20 in ice-cold lysis buffer, homogenized rapidly by sonicating for 10 s, and centrifuged  
21 (12000 g for 15 min at 4  $^{\circ}$ C). The supernatant fraction was aliquoted and stored at  
22 -80  $^{\circ}$ C before being used for Western blotting.

### 24 **Enrichment of synaptic and extrasynaptic membrane fractions**

26 Separation of synaptic and extrasynaptic fractions was performed according to  
27 previous reports (Goebel-Goody et al., 2009; Li et al., 2011) with minor modifications.  
28 In brief, the amygdala slices were prepared as for electrophysiological experiment and  
29 treated with NE (10  $\mu$ M for 10 min) after recovery. Then the slices were harvested in  
30 ice-cold sucrose homogenization buffer (20  $\mu$ L per slice) containing the following (in  
31 mM): 320 sucrose, 10 Tris (pH7.4), 1 Na<sub>3</sub>VO<sub>4</sub>, 5 NaF, 1 EDTA and 1 EGTA. Slices  
32 were then homogenized in a glass grinding vessel using a rotating Teflon pestle (2000  
33 rpm) with at least 20 passes to create a Dounce homogenate. The homogenate was  
34 centrifuged (1000 g for 10 min at 4  $^{\circ}$ C) to remove nuclei and incompletely  
35 homogenized material. The supernatant was centrifuged at 10000 g, 4  $^{\circ}$ C for 15 min,  
36 and the resulting pellet was resuspended in 60  $\mu$ L of sucrose buffer using a pipette  
37 directly in the microfuge tube with 30 pulses. The resuspension solution was then  
38 subjected to detergent extraction by adding 8 volume of Triton X-100 buffer  
39 (final=0.5% v/v) containing the following reagents (in mM): 10 Tris (pH7.4), 1  
40 Na<sub>3</sub>VO<sub>4</sub>, 5 NaF, 1 EDTA and 1 EGTA. This suspension was incubated at 4  $^{\circ}$ C for 20  
41 min with gentle rotation and then centrifuged at 32000 g, 4  $^{\circ}$ C for 20 min. The pellet  
42 was the postsynaptic density-associated (or synaptic) fraction and the supernatant was  
43 the Triton-soluble (or extrasynaptic) fraction. Protein concentrations were determined

1 using Coomassie blue protein-binding assay (Nanjing Jiancheng Institute of  
2 Biological Engineering, Nanjing, China) before Western blot analysis.

### 3 **Western blotting**

4 Protein samples of the amygdala were prepared for western blot analysis. The  
5 performance was based on our previous protocol with minor modifications (Jiang et  
6 al., 2013). Briefly, amygdala slices from each rat were homogenized in ice-cold lysis  
7 buffer. Protein concentrations were examined by Coomassie blue protein-binding  
8 assay. Then protein samples (30 or 50  $\mu\text{g}$ ) were separated by 10% or 6%  
9 SDS-polyacrylamide gel and then transferred to nitrocellulose membranes. After  
10 blocking with 5% bovine serum albumin (BSA; Sigma-Aldrich) in Tris-buffered  
11 saline containing 0.1% Tween-20 (TBST) for 1 h at room temperature, the transferred  
12 membranes were incubated overnight at 4  $^{\circ}\text{C}$  with primary antibodies: anti- $\beta$ -actin  
13 (1:3000) (Upstate Biotechnology, Lake Placid, NY, USA); anti-phospho-CaMKII  
14 (1:400) and anti-CaMKII (1:500) (Cell Signaling, San Francisco, CA, USA);  
15 anti-phospho-ERK1/2 (1:1000) and anti-ERK1/2 (1:1000) (Santa Cruz Biotechnology,  
16 Santa Cruz, CA, USA); anti-phospho-PKA C (Thr197) (1:800) and anti-PKA C  
17 (1:1000) (Cell Signaling); anti-phospho-PKC (1:800) and anti-PKC (1:1000) (Cell  
18 Signaling); anti-phospho-GluA1 (Ser831) (1:400), anti-phospho-GluA1 (Ser845)  
19 (1:400) and anti-GluA1 (1:500) (Cell Signaling); anti-phospho-GluA2 (Tyr876)  
20 (1:400) and anti-GluA2 (1:1000) (Cell Signaling); anti-GluN2A (1:500) and  
21 anti-GluN2B (1:500) (Santa Cruz Biotechnology). Following three washes with TBST,  
22 membranes were then incubated with horseradish peroxidase (HRP)-conjugated  
23 secondary antibodies (1:3000) in TBST with 1% BSA for 1 h at room temperature,  
24 and reacted with enhanced chemiluminescence reagents (Super Signal West Pico;  
25 Pierce Chemical Co., Rockford, IL, USA). Images were scanned and captured with  
26 Micro Chemi (DNR Bio-imaging systems, Jerusalem, Israel) and the optical density  
27 of the bands was determined using Scion Image software (Fredrick, MD, USA). All  
28 assays were performed at least three times, and the results are presented as percentage  
29 of control after normalization.

30

### 31 **References**

32 Goebel-Goody SM, Davies KD, Alvestad Linger RM, Freund RK, Browning MD  
33 (2009) Phospho-regulation of synaptic and extrasynaptic N-methyl-d-aspartate  
34 receptors in adult hippocampal slices. *Neuroscience* 158:1446-1459.  
35 Jiang B, Wang W, Wang F, Hu ZL, Xiao JL, Yang S, Zhang J, Peng XZ, Wang JH,  
36 Chen JG (2013) The stability of NR2B in the nucleus accumbens controls behavioral  
37 and synaptic adaptations to chronic stress. *Biol Psychiatry* 74:145-155.  
38 Li S, Jin M, Koeglsperger T, Shepardson NE, Shankar GM, Selkoe DJ (2011) Soluble  
39 Abeta oligomers inhibit long-term potentiation through a mechanism involving  
40 excessive activation of extrasynaptic NR2B-containing NMDA receptors. *J Neurosci*  
41 31:6627-6638.  
42 Li YK, Wang F, Wang W, Luo Y, Wu PF, Xiao JL, Hu ZL, Jin Y, Hu G, Chen JG (2012)  
43 Aquaporin-4 deficiency impairs synaptic plasticity and associative fear memory in the

1 lateral amygdala: involvement of downregulation of glutamate transporter-1  
2 expression. *Neuropsychopharmacology* 37:1867-1878.

3 Luo Y, Wu PF, Zhou J, Xiao W, He JG, Guan XL, Zhang JT, Hu ZL, Wang F, Chen JG  
4 (2014) Aggravation of seizure-like events by hydrogen sulfide: involvement of  
5 multiple targets that control neuronal excitability. *CNS Neurosci Ther* 20:411-419.

6 Shi S, Hayashi Y, Esteban JA, Malinow R (2001) Subunit-specific rules governing  
7 AMPA receptor trafficking to synapses in hippocampal pyramidal neurons. *Cell*  
8 105:331-343.

9 Wang W, Wang F, Yang YJ, Hu ZL, Long LH, Fu H, Xie N, Chen JG (2011) The  
10 flavonoid baicalein promotes NMDA receptor-dependent long-term potentiation and  
11 enhances memory. *Br J Pharmacol* 162:1364-1379.

12 Wu WN, Wu PF, Zhou J, Guan XL, Zhang Z, Yang YJ, Long LH, Xie N, Chen JG,  
13 Wang F (2013) Orexin-A activates hypothalamic AMP-activated protein kinase  
14 signaling through a Ca(2)(+)-dependent mechanism involving voltage-gated L-type  
15 calcium channel. *Mol Pharmacol* 84:876-887.

16 Yang J, Li MX, Luo Y, Chen T, Liu J, Fang P, Jiang B, Hu ZL, Jin Y, Chen JG, Wang  
17 F (2013) Chronic ceftriaxone treatment rescues hippocampal memory deficit in AQP4  
18 knockout mice via activation of GLT-1. *Neuropharmacology* 75C:213-222.

## 21 Supplementary Figure legends

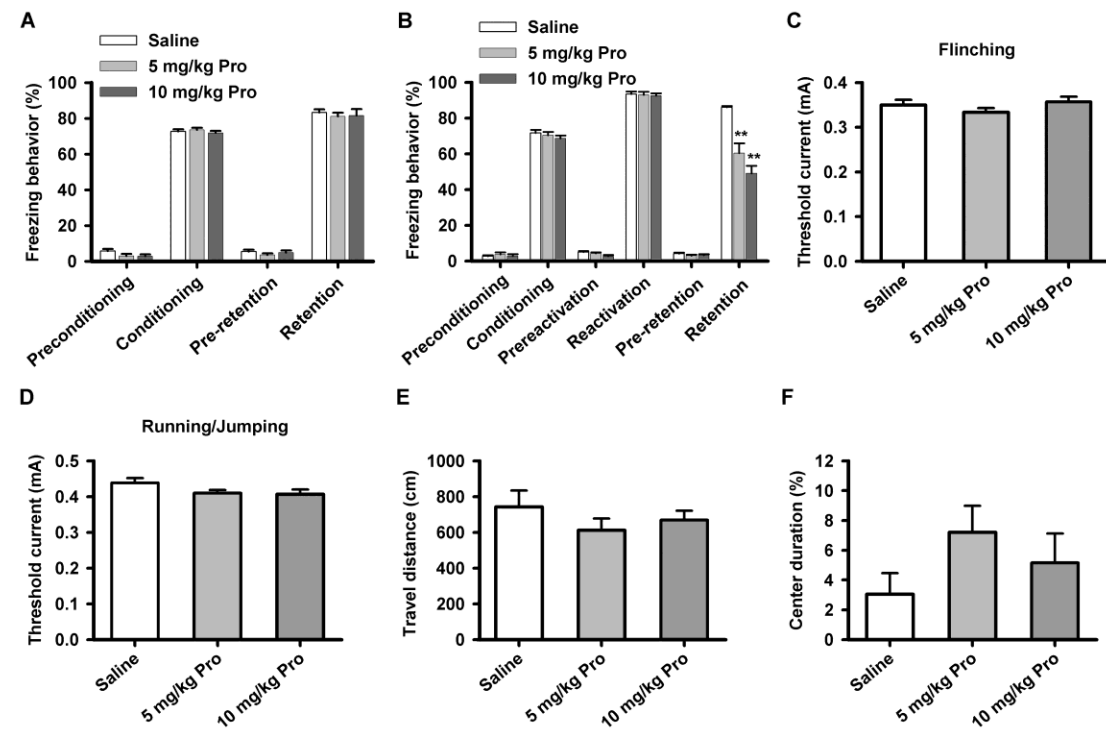

22  
23 **Figure S1.** There are no differences in baseline behaviors between saline and  
24 propranolol-treated rats. (A) Saline (n=8), 5 mg/kg (n=8) and 10 mg/kg (n=8)  
25 propranolol-treated rats exhibited similar freezing behavior before and during  
26 conditioning training, and before and during consolidation test. (B) Saline (n=8), 5  
27 mg/kg (n=8) and 10 mg/kg (n=8) propranolol-treated rats exhibited similar freezing

1 behavior before and during conditioning training, and before and during reactivation.  
 2 (C) Thresholds of shock intensities for flinching. (D) Thresholds of shock intensities  
 3 for running/jumping. No difference was observed among saline (n=12), 5 mg/kg  
 4 (n=12) and 10 mg/kg (n=12) propranolol-treated rats. (E) Total distance moved and (F)  
 5 the percentage of time spent in central part during 30 min intervals in the open-field  
 6 test. No difference was observed among saline (n=10), 5 mg/kg (n=10) and 10 mg/kg  
 7 (n=10) propranolol-treated rats. \*\*P<0.01 vs saline.

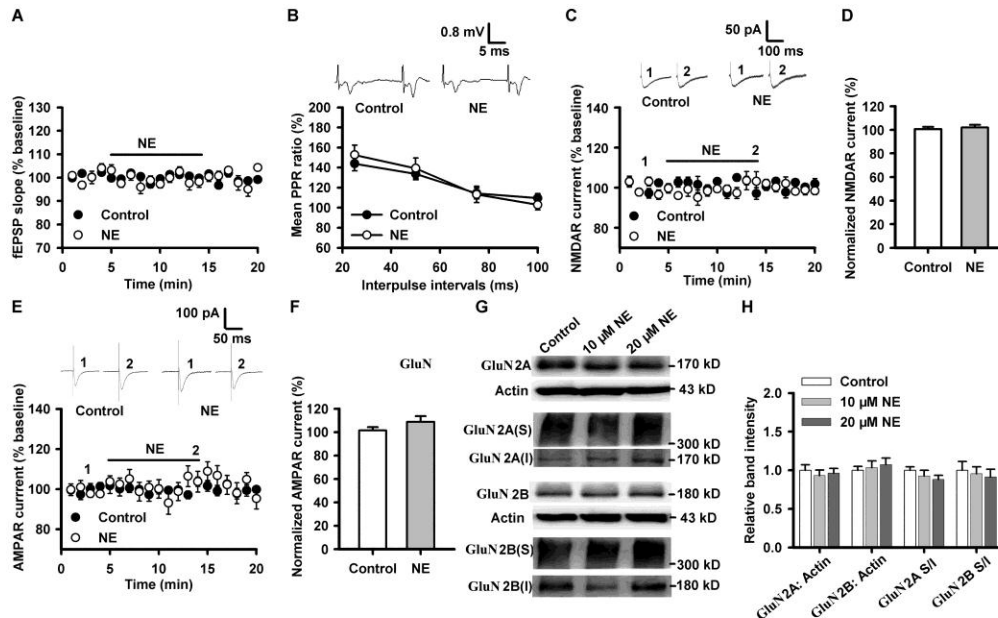

8  
 9 **Figure S2.** Negative effects of NE on glutamatergic synapse transmission. (A) The  
 10 basal fEPSP was not affected by NE in LA slices of rats (n=6 slices from 4 rats). (B)  
 11 Paired-pulse ratio recording. Insets are representative fEPSPs evoked by paired-pulses  
 12 delivered 25 ms apart (n=6 slices from 4 rats). (C) No difference in basal  
 13 NMDAR-current was observed between control slices (n=7 from 4 rats) and slices  
 14 treated with NE (n=7 from 4 rats). Insets are representative NMDAR-currents  
 15 recorded from experiments. (D) Bar graphs showing the mean normalized amplitude  
 16 of control and NE-treated slices. (E) No difference in basal AMPAR-current was  
 17 observed in control slices (n=6 from 4 rats) and slices treated with NE (n=10 from 5  
 18 rats). Insets are representative AMPAR-currents recorded from experiments. (F) Bar  
 19 graphs showing the mean normalized amplitude of control and NE-treated slices. (G)  
 20 Representative images of western blotting. (H) Histogram showing the total and  
 21 surface expression of NMDAR subunits **GluN2A** and **GluN2B** were not affected by  
 22 10 μM NE for 10 min (n=8).

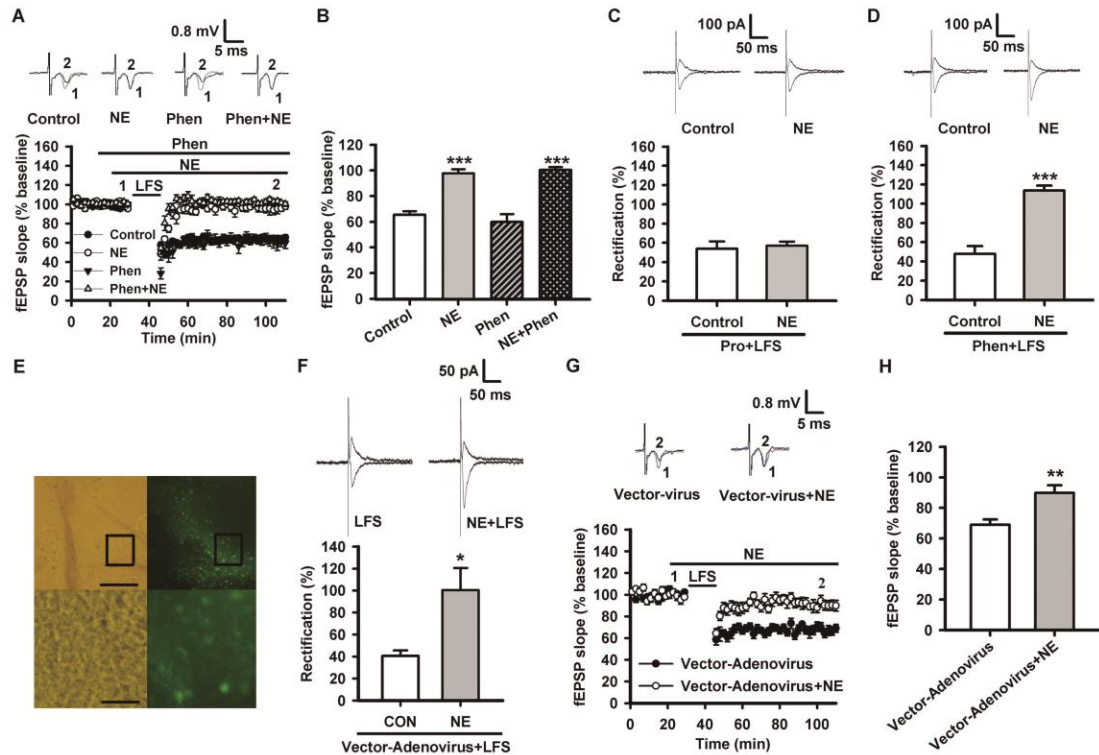

1

2 **Figure S3.** Activation of  $\beta$ -AR and phosphorylation of **GluA1-C** terminus mediate  
3 NE-induced upregulation of AMPAR function in LA. (A) Time course of the fEPSP  
4 from control (n=12 slices from 7 rats), NE (n=7 slices from 4 rats), Phen (n=7 slices  
5 from 4 rats) and Phen+NE-treated slices (n=7 slices from 4 rats). Inset: The  
6 representative fEPSPs recorded in individual slices before (1) and 60 min after (2)  
7 LFS in control, NE, Phen or Phen+NE-treated slices. (B) The histogram showing the  
8 level of LTD at 60 min after LFS in control, NE, Phen or Phen+NE-treated slices. (C)  
9 Inset: Example of evoked AMPAR-mediated synaptic responses recorded at -70 mV  
10 and +40 mV from Pro and LFS-treated, or Pro and NE+LFS-treated slices. Average  
11 rectification values ( $I_{-70\text{ mV}}/I_{+40\text{ mV}}$ ) for LFS (n=5 from 4 rats) or NE+LFS (n=6 from 3  
12 rats)-treated slices. Values are normalized to control cells. (D) Inset: Example of  
13 evoked AMPAR-mediated synaptic responses recorded at -70 mV and +40 mV from  
14 Phen and LFS-treated, or Phen and NE+LFS-treated slices. Average rectification  
15 values ( $I_{-70\text{ mV}}/I_{+40\text{ mV}}$ ) for LFS (n=5 from 4 rats) or NE+LFS (n=5 from 4 rats)-  
16 treated slices. Values are normalized to control cells. (E) Representative images of  
17 transmitted light (left) and fluorescence (right) of a coronal section of the right LA at  
18 36 h after injection of adenovirus. Fluorescence indicates successful infection of  
19 adenovirus. The corresponding enlarged images of the upper were shown at the lower.  
20 Scale bars in the images represent 200 (upper) and 50  $\mu\text{m}$  (lower). (F) Inset: Example  
21 of evoked AMPAR-mediated synaptic responses recorded at -70 mV and +40 mV  
22 from vector-adenovirus-infected and LFS or NE+LFS-treated slices. Average  
23 rectification values ( $I_{-70\text{ mV}}/I_{+40\text{ mV}}$ ) for LFS (n=5 from 5 rats) or NE+LFS (n=5 from 5  
24 rats)-treated slices. Values are normalized to control cells. (G) Time course of the  
25 fEPSP from vector infection (n=12 slices from 7 rats) or vector infection+NE (n=7  
26 slices from 4 rats)-treated slices. Inset: The representative fEPSPs recorded in

1 individual slices before (1) and 60 min after (2) LFS in vector infection or vector  
 2 infection+NE-treated slices. (H) The histogram showing the level of LTD at 60 min  
 3 after LFS. \* $P < 0.05$ , \*\* $P < 0.01$ , \*\*\* $P < 0.001$  vs control or vector-adenovirus.

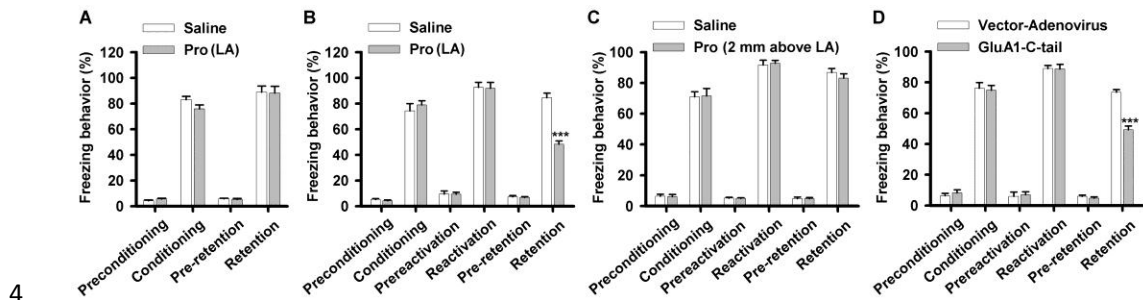

5 **Figure S4.** Neither propranolol nor overexpression of **GluA1**-C-tail in LA influences  
 6 fear acquisition, consolidation or reactivation of rats. (A) Saline (n=7) and  
 7 propranolol (n=9)-treated rats exhibited similar freezing behavior before and during  
 8 conditioning training, and before and during consolidation test. (B) Saline (n=7) and  
 9 propranolol (n=7)-treated rats exhibited similar freezing behavior before and during  
 10 conditioning training, and before and during reactivation. (C) Saline (n=7) and  
 11 propranolol (n=8)-treated rats exhibited similar freezing behavior before and during  
 12 conditioning training, and before and during reactivation. (D) Vector-adenovirus (n=8)  
 13 and overexpression of **GluA1**-C-tail-treated groups (n=9) exhibited similar freezing  
 14 behavior before and during conditioning training, and before and during reactivation.  
 15 \*\*\* $P < 0.001$  vs saline or vector-adenovirus-treated rats.
